# Supplementary material for: Insight into the preponderant role of the lattice size in Sn-based colusites for promoting a high power factor
Source: Royal Society of Chemistry journal article supplement (doi:10.1039/d2ta01210c), 2022-01-01
Supplement: d2ta01210c1.pdf [file d2ta01210c1.pdf]

## Supporting Information

### Insight of the preponderant role of the lattice size in the Sn-based colusite for promoting high power factor

Paulina Kamińska<sup>a</sup>, Cédric Bourgès<sup>b\*</sup>, Raju Chetty<sup>b</sup>, Daniel Gutiérrez-Del-Río<sup>b</sup>, Piotr Śpiewak<sup>a</sup>,  
Wojciech Świążkowski<sup>a</sup>, Toshiyuki Nishimura<sup>c</sup>, Takao Mori<sup>b,d\*</sup>

<sup>a</sup> *Materials Design Division, Faculty of Materials Science and Engineering, Warsaw University of Technology, Wołoska 141, 02-507 Warsaw, Poland*

<sup>b</sup> *WPI International Center for Materials Nanoarchitectonics (WPI-MANA), National Institute for Materials Science (NIMS), Namiki 1-1, Tsukuba, 305-0044, Japan*

<sup>c</sup> *Research Center for Structural Materials, National Institute for Materials Science (NIMS), Namiki 1-1, Tsukuba, 305-0044, Japan*

<sup>d</sup> *Graduate School of Pure and Applied Sciences, Tsukuba University, Tennoudai 1-1-1, Tsukuba 305-8671, Japan*

**Corresponding authors:** BOURGES.Cedric@nims.go.jp; MORI.Takao@nims.go.jp

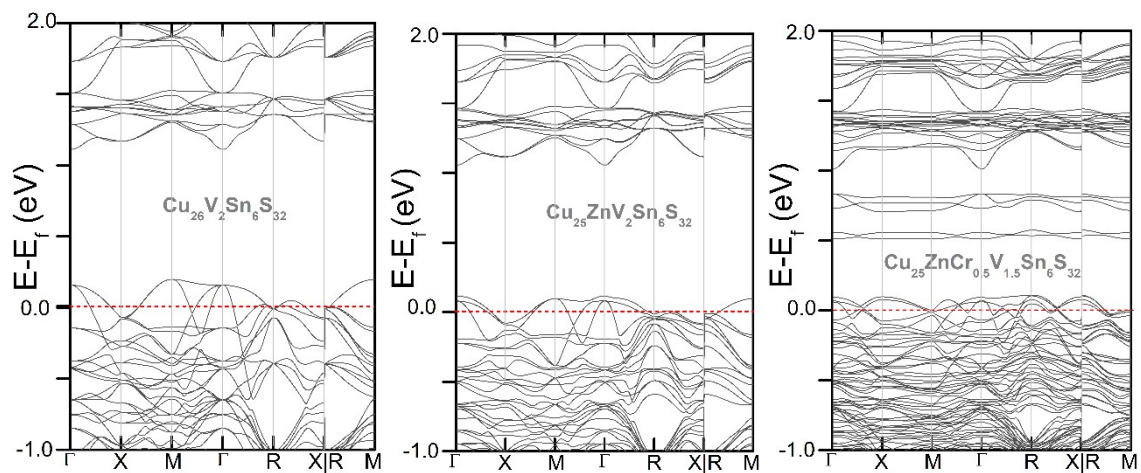

**Figure S1.** Electronic band structures of  $\text{Cu}_{26}\text{V}_2\text{Sn}_6\text{S}_{32}$ ,  $\text{Cu}_{25}\text{ZnV}_2\text{Sn}_6\text{S}_{32}$ , and  $\text{Cu}_{25}\text{ZnCr}_{0.5}\text{V}_{1.5}\text{Sn}_6\text{S}_{32}$

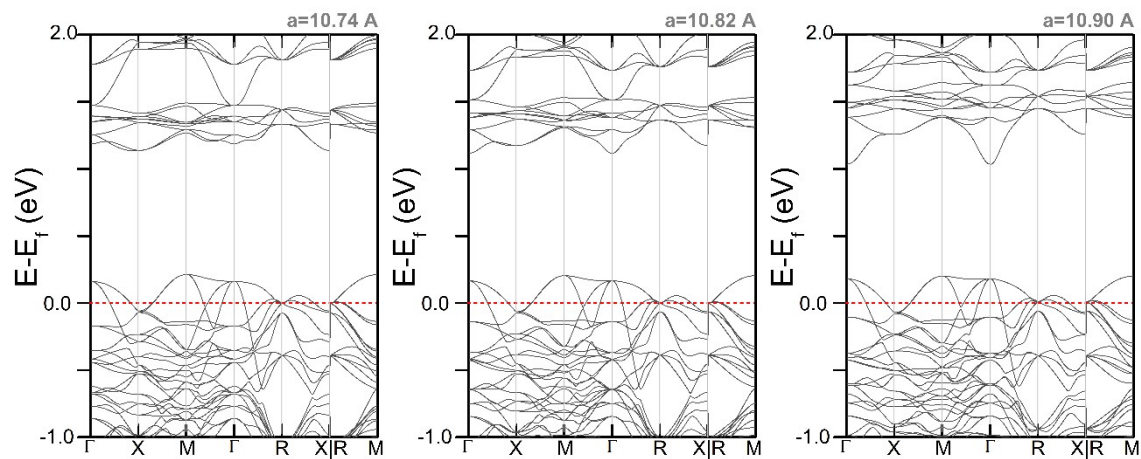

**Figure S2.** Electronic band structures and density of states (DOS) of  $\text{Cu}_{26}\text{V}_2\text{Sn}_6\text{S}_{32}$  assuming different lattice parameters  $a$  (10.74 Å, 10.82 Å, and 10.90 Å)

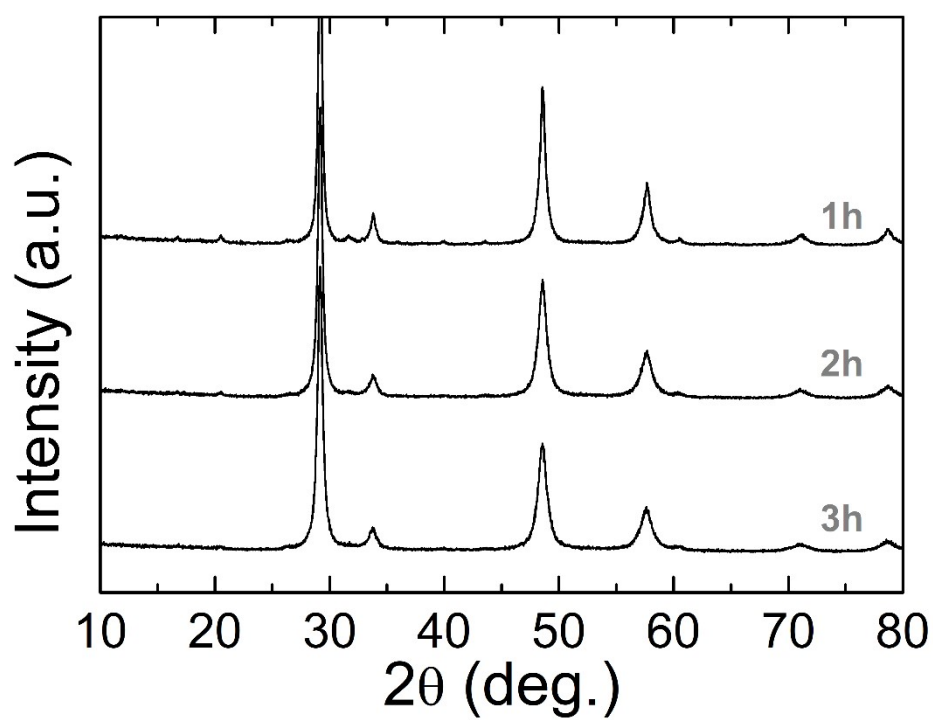

**Figure S3.** Powder X-ray diffraction patterns of  $\text{Cu}_{25}\text{ZnV}_2\text{Ge}_6\text{S}_{32}$  compounds ball milled for a different time

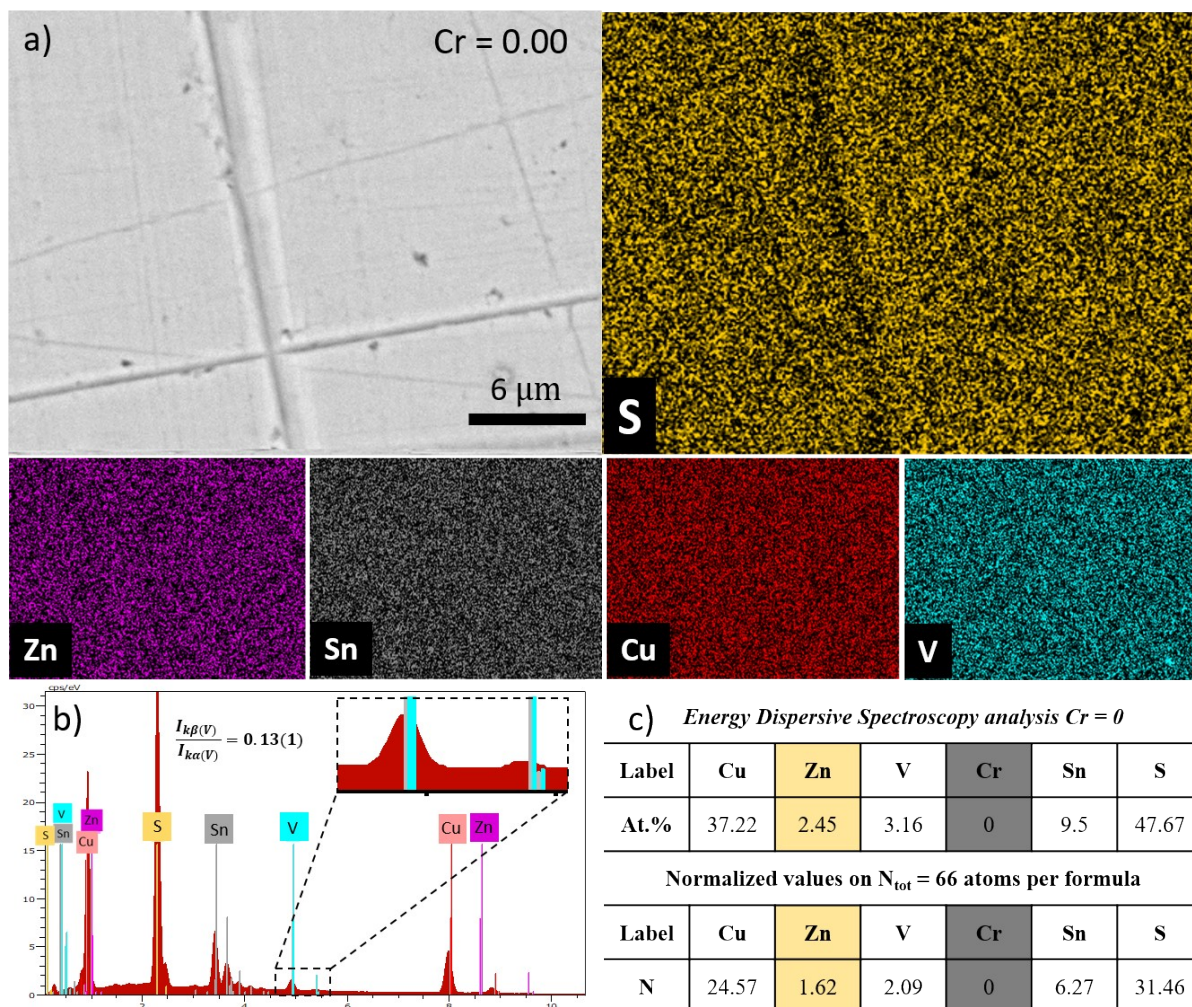

**Figure S4.** Energy dispersive spectroscopy analysis results on the polished surface of the  $Cu_{25}ZnV_2Sn_6S_{32}$  sample sintered by SPS with a) EDS mapping b) its corresponding spectrum, and c) calculated atomic compositions



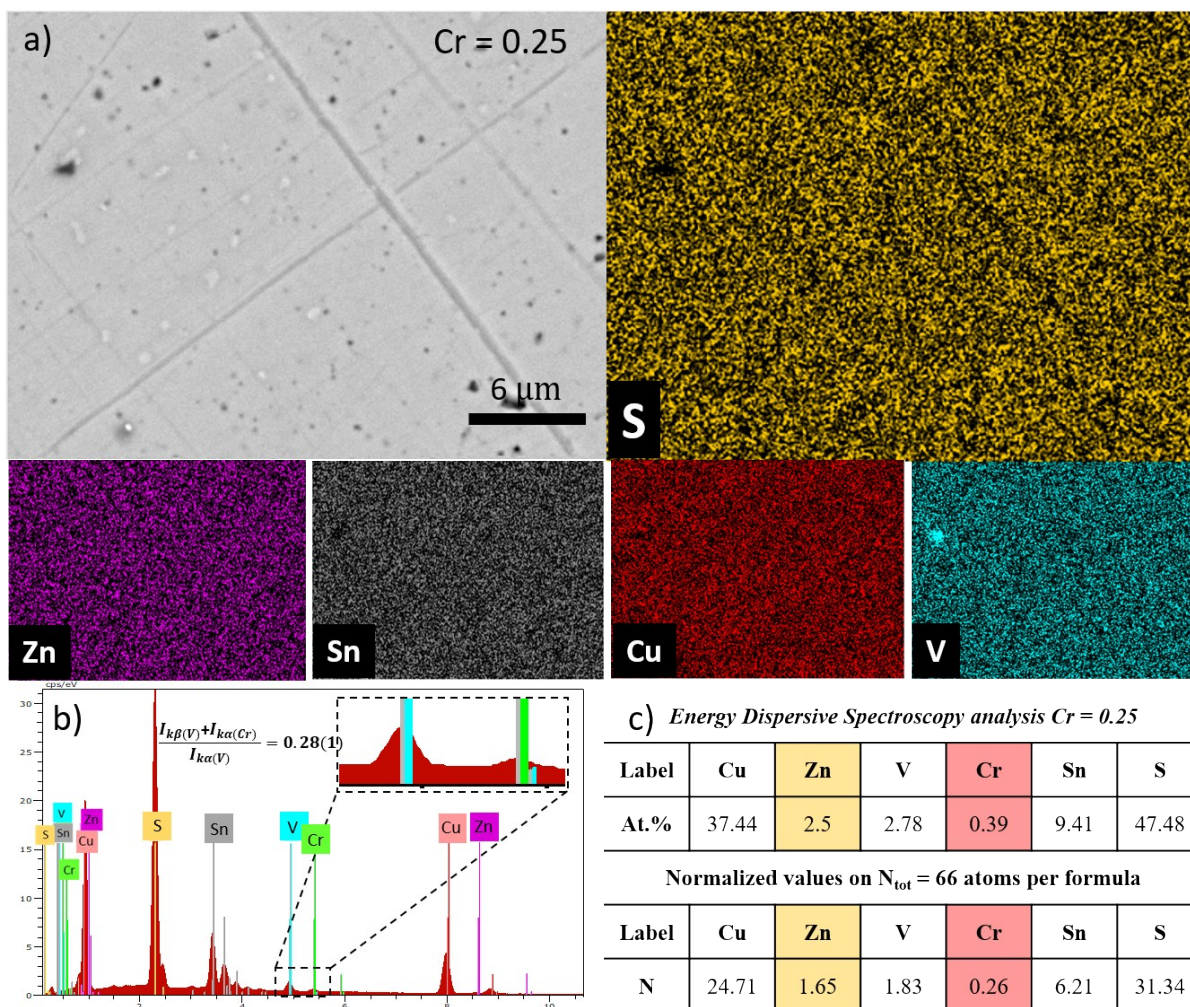

**Figure S5.** Energy dispersive spectroscopy analysis results on the polished surface of the  $Cu_{25}ZnV_{1.75}Cr_{0.25}Sn_6S_{32}$  sample sintered by SPS with a) EDS mapping b) its corresponding spectrum, and c) calculated atomic compositions

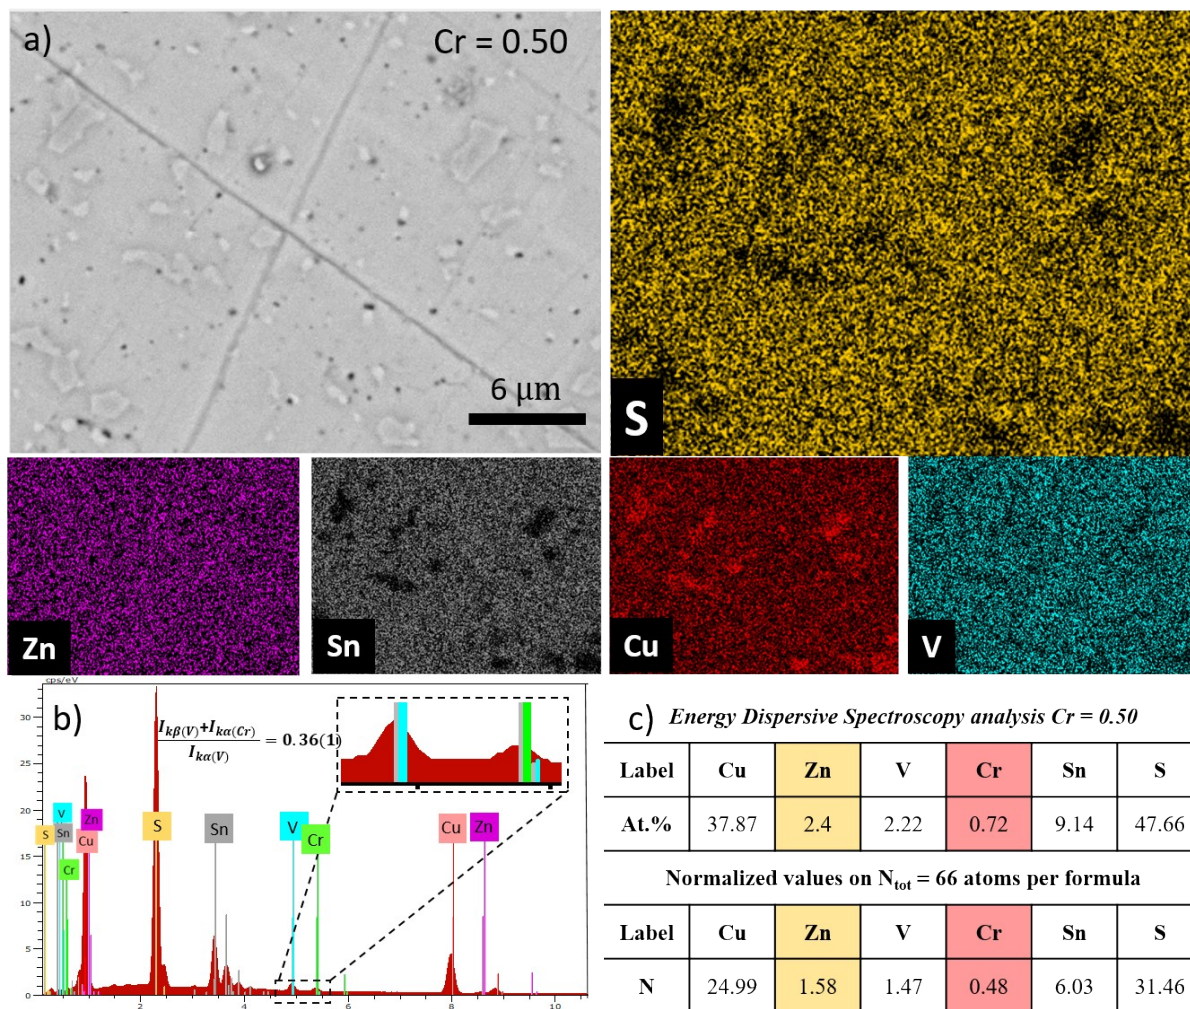

**Figure S6.** Energy dispersive spectroscopy analysis results on the polished surface of the  $Cu_{25}ZnV_{1.5}Cr_{0.5}Sn_6S_{32}$  sample sintered by SPS with a) EDS mapping b) its corresponding spectrum, and c) calculated atomic compositions

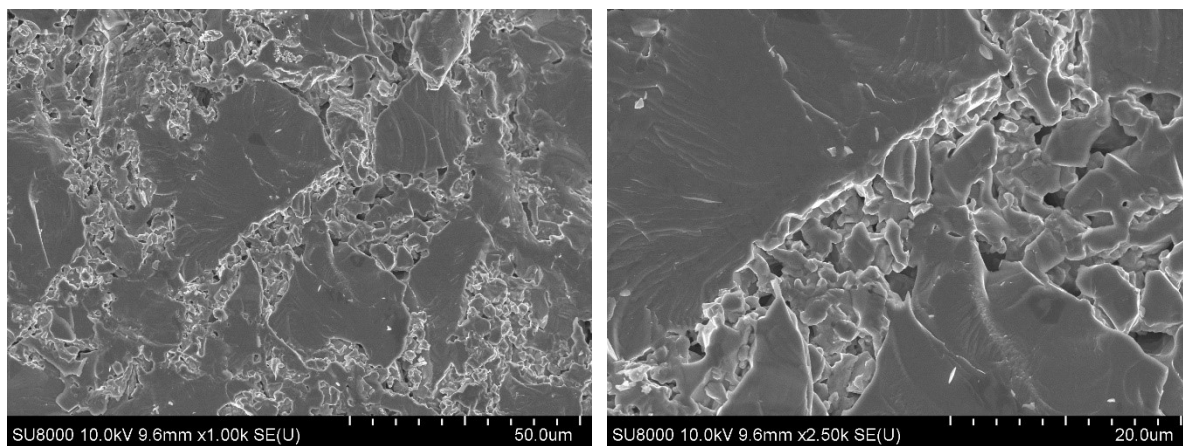

**Figure S7.** SEM images of a fractured surface of  $\text{Cu}_{25}\text{ZnV}_2\text{Sn}_6\text{S}_3$  without ball milling step during the fabrication process



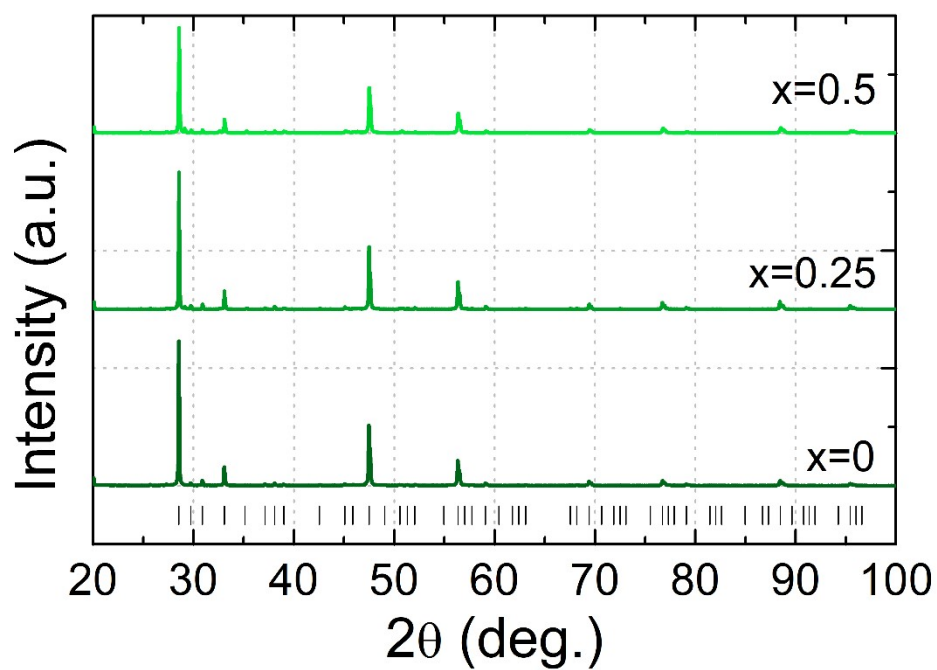

**Figure S8.** Powder X-ray diffraction patterns of sintered  $\text{Cu}_{25}\text{ZnV}_{2-x}\text{Cr}_x\text{Sn}_6\text{S}_{32}$  compounds by hot-pressing

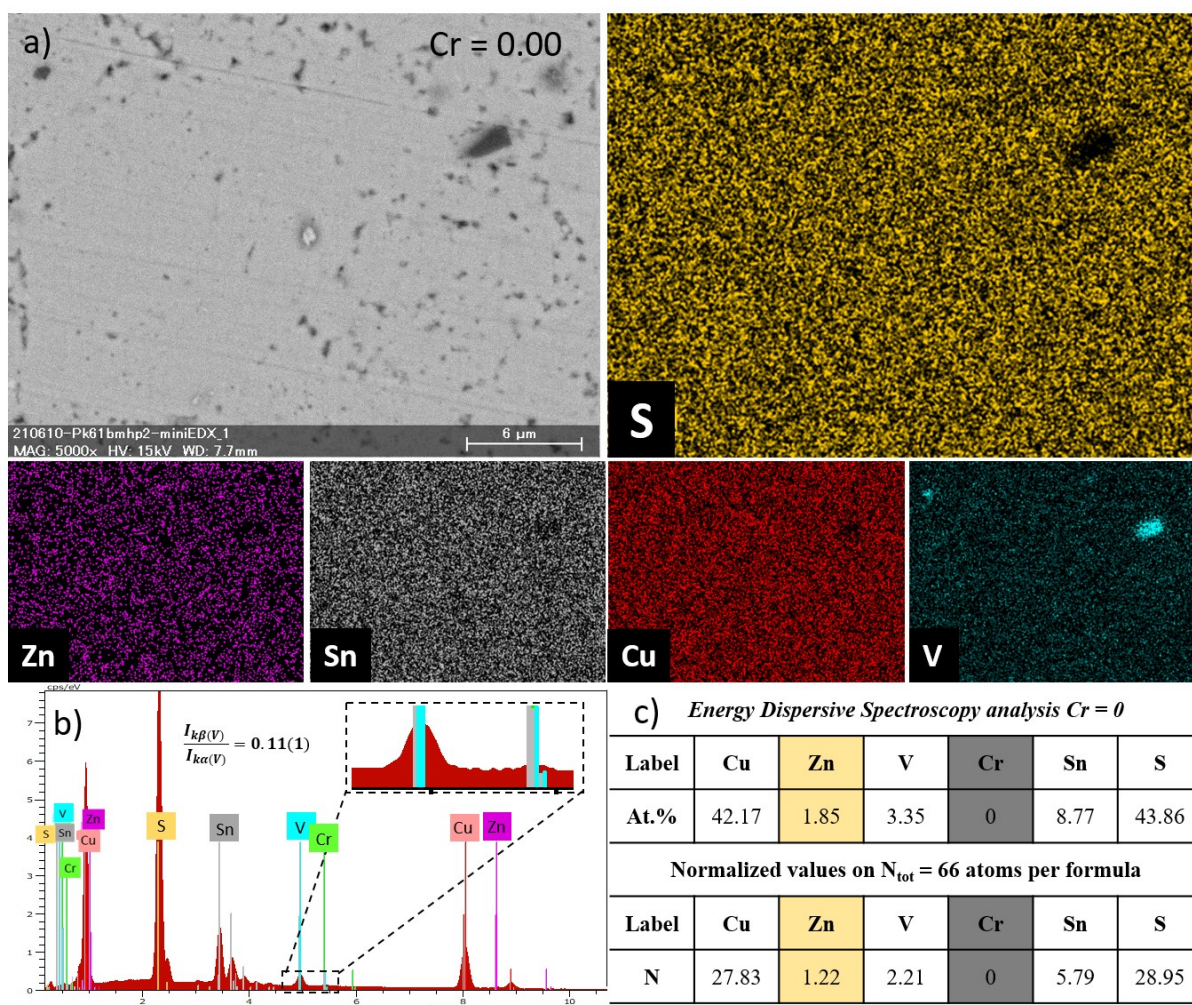

**Figure S9.** Energy dispersive spectroscopy analysis results on the polished surface of the  $Cu_{25}ZnV_2Sn_6S_{32}$  sample sintered by hot-pressing with a) EDS mapping b) its corresponding spectrum, and c) calculated atomic compositions

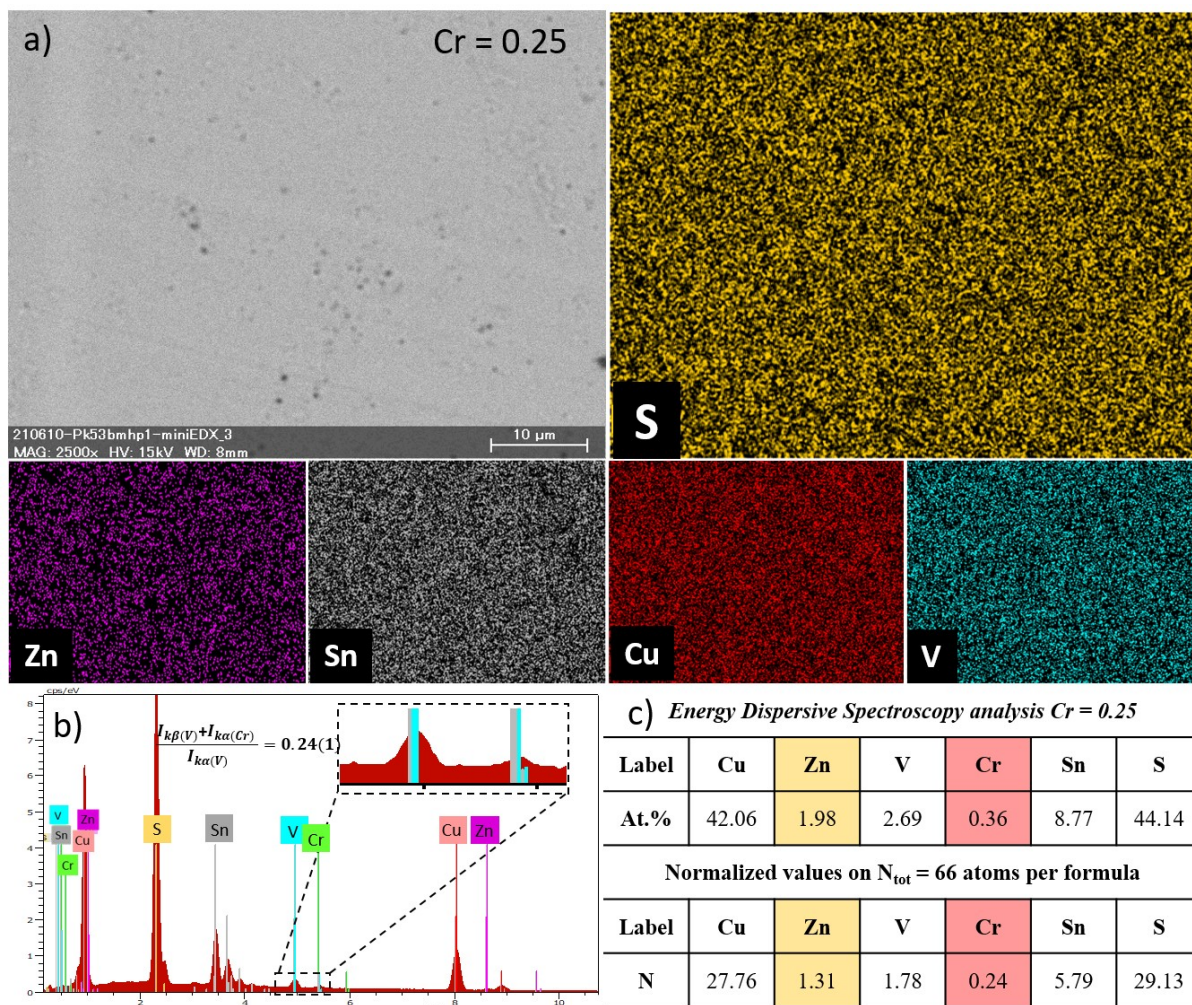

**Figure S10.** Energy dispersive spectroscopy analysis results on the polished surface of the  $\text{Cu}_{25}\text{ZnV}_{1.75}\text{Cr}_{0.25}\text{Sn}_6\text{S}_{32}$  sample sintered by hot-pressing with a) EDS mapping b) its corresponding spectrum, and c) calculated atomic compositions



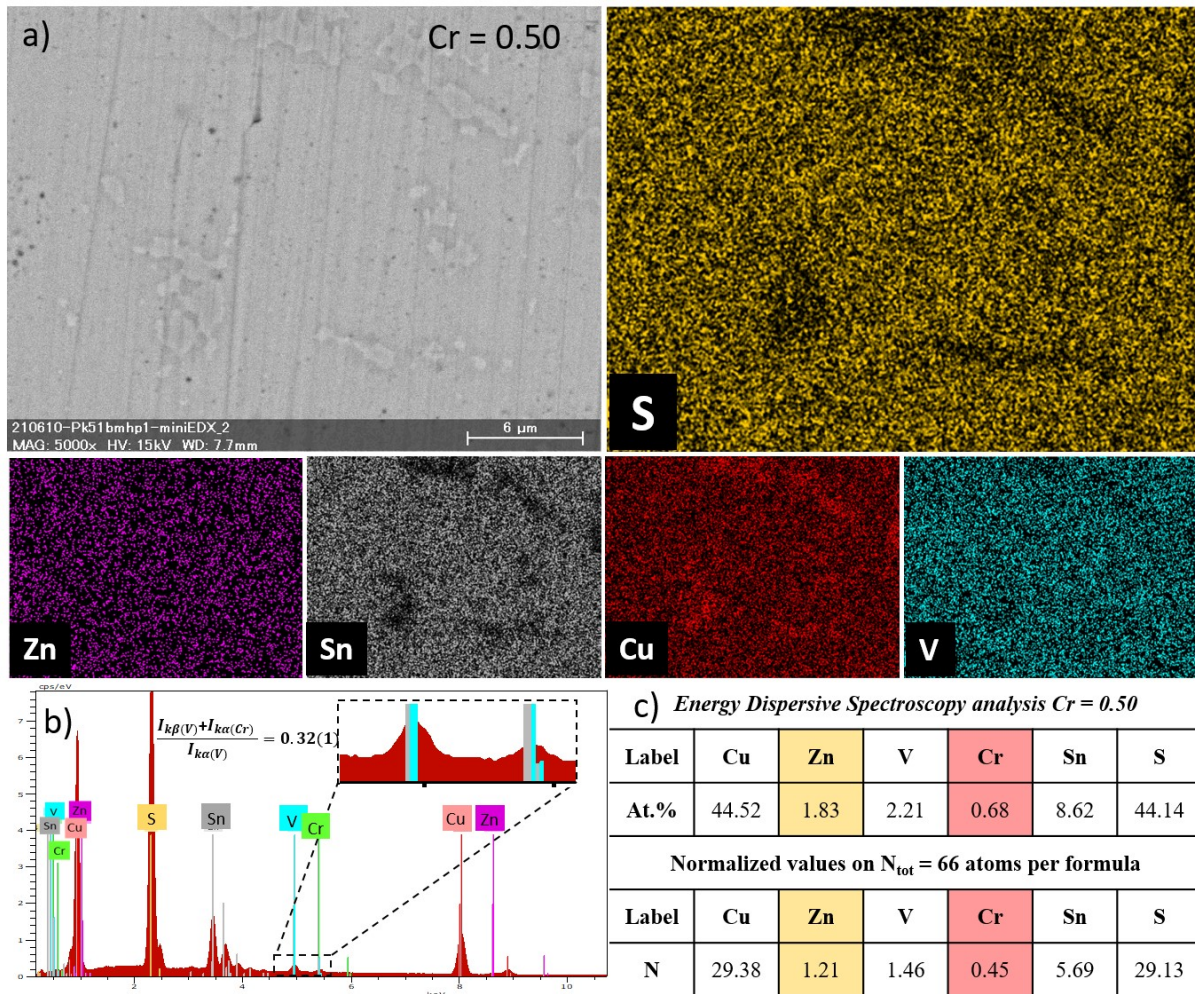

**Figure S11.** Energy dispersive spectroscopy analysis results on the polished surface of the  $\text{Cu}_{25}\text{ZnV}_{1.75}\text{Cr}_{0.25}\text{Sn}_6\text{S}_{32}$  sample sintered by SPS with a) EDS mapping b) its corresponding spectrum, and c) calculated atomic compositions



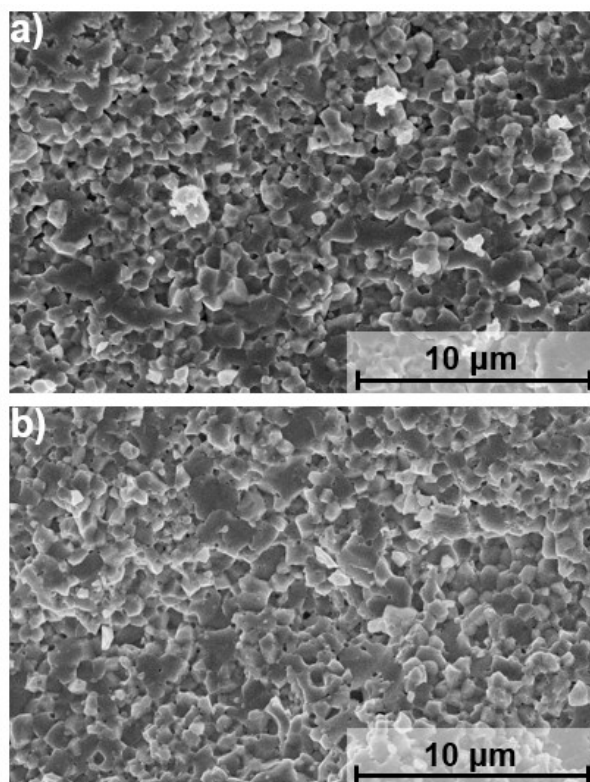

**Figure S12.** SEM images of a fractured surface of the hot-pressed  $\text{Cu}_{25}\text{ZnV}_{2-x}\text{Cr}_x\text{Sn}_6\text{S}_{32}$  (a)  $x = 0$ , (b)  $x = 0.5$ .
